# Supplementary material
Source: PubMed Central journal article supplement (PMC9017209)
Supplement: mmc1.pdf [file mmc1.pdf]

**Cell Reports Methods, Volume 1**

**Supplemental information**

**Development of a pan-neuronal genetic driver  
in *Aedes aegypti* mosquitoes**

**Zhilei Zhao, David Tian, and Carolyn S. McBride**

## Supplemental Information

Table S1. sgRNA cutting efficiency. Related to STAR Methods.

| sgRNA name | Target gene                 | sgRNA cut location   | Target sequence (PAM underlined)     | Evaluation method | Evaluation criteria                | Cutting efficiency | Evaluation primer forward                                               | Evaluation primer reverse                                                | Note                  |
|------------|-----------------------------|----------------------|--------------------------------------|-------------------|------------------------------------|--------------------|-------------------------------------------------------------------------|--------------------------------------------------------------------------|-----------------------|
| sgRNA-syt1 | <i>Syt1</i><br>(AAEL000704) | Chr2:<br>459,055,055 | GCACACTCTTAAAGA<br>CCCGG <u>AGG</u>  | Fragment analysis | Variability of fragment length     | High               | TGAAAACGACGG<br>CCAGTTGTGGTGG<br>ATTACGATCGCA                           | GTGTCTTTCAGT<br>GTCTCTTGTCTC<br>TCG                                      | Used for HDR knock-in |
| sgRNA-syt2 | <i>Syt1</i><br>(AAEL000704) | Chr2:<br>459,054,995 | ATGCCAGCATGTCTG<br>ACCAGT <u>G</u> G | Fragment analysis | Variability of fragment length     | Low                | TGAAAACGACGG<br>CCAGTTGTGGTGG<br>ATTACGATCGCA                           | GTGTCTTTCAGT<br>GTCTCTTGTCTC<br>TCG                                      |                       |
| sgRNA-syt3 | <i>Syt1</i><br>(AAEL000704) | Chr2:<br>459,055,074 | GAGGACGACAAGAA<br>GGACTA <u>AGG</u>  | Fragment analysis | Variability of fragment length     | Medium             | TGAAAACGACGG<br>CCAGTTGTGGTGG<br>ATTACGATCGCA                           | GTGTCTTTCAGT<br>GTCTCTTGTCTC<br>TCG                                      |                       |
| sgRNA-syt4 | <i>Syt1</i><br>(AAEL000704) | Chr2:<br>459,039,097 | CTAAAGAAGATGGAC<br>GTCGG <u>AGG</u>  | Fragment analysis | Variability of fragment length     | Low                | TGAAAACGACGG<br>CCAGTATAACAAG<br>CTGGGAGACATC                           | GTGTCTTTCAGT<br>ATCTCATAGTAG<br>GC                                       |                       |
| sgRNA-syt5 | <i>Syt1</i><br>(AAEL000704) | Chr2:<br>459,016,400 | CAAAGCGTCGAAGG<br>CGAAGG <u>CGG</u>  | Fragment analysis | Variability of fragment length     | Low                | TGAAAACGACGG<br>CCAGTGTATGCCG<br>ACGCGATGAAC                            | GTGTCTTCATAA<br>ACCTGACTATGG<br>ATCGGAAC                                 |                       |
| sgRNA-syt6 | <i>Syt1</i><br>(AAEL000704) | Chr2:<br>459,055,052 | ATGGCACACTCTTAA<br>AGACCC <u>G</u> G | Fragment analysis | Variability of fragment length     | Low                | TGAAAACGACGG<br>CCAGTTGTGGTGG<br>ATTACGATCGCA                           | GTGTCTTTCAGT<br>GTCTCTTGTCTC<br>TCG                                      |                       |
| sgRNA-syt7 | <i>Syt1</i><br>(AAEL000704) | Chr2:<br>459,039,336 | GAGAACGACTCATTG<br>TAGTAG <u>G</u> G | Fragment analysis | Variability of fragment length     | Low                | TGAAAACGACGG<br>CCAGTCATACGTA<br>AAGATTGCACTG                           | GTGTCTTACAGT<br>ACGGCATGTATA<br>G                                        |                       |
|            |                             |                      |                                      |                   |                                    |                    |                                                                         |                                                                          |                       |
| sgRNA-brp1 | <i>brp</i><br>(AAEL018153)  | Chr2:<br>234,771,924 | AAGCTCTTCAGGAAA<br>CCGGCT <u>TGG</u> | MiSeq             | Fraction of reads that have indels | 0.052              | TCGTCGGCAGCGT<br>CAGATGTGTATAA<br>GAGACAGCTGGT<br>GCTCTGCAGTTTG<br>AAG  | GTCTCGTGGGC<br>TCGGAGATGTG<br>TATAAGAGACAG<br>ACTGCAACTGGT<br>ACAGATGACA |                       |
| sgRNA-brp2 | <i>brp</i><br>(AAEL018153)  | Chr2:<br>234,771,909 | CCGGCTGGTCCAGC<br>ATCTT <u>GCGG</u>  | MiSeq             | Fraction of reads that have indels | 0.447              | TCGTCGGCAGCGT<br>CAGATGTGTATAA<br>GAGACAGCTGGT<br>GCTCTGCAGTTTG<br>AAG  | GTCTCGTGGGC<br>TCGGAGATGTG<br>TATAAGAGACAG<br>ACTGCAACTGGT<br>ACAGATGACA |                       |
| sgRNA-brp3 | <i>brp</i><br>(AAEL018153)  | Chr2:<br>234,771,739 | GCAACTGGTACAGAT<br>GACAC <u>AGG</u>  | MiSeq             | Fraction of reads that have indels | 0.585              | TCGTCGGCAGCGT<br>CAGATGTGTATAA<br>GAGACAGACTGTG<br>CCAATACTAATGC<br>CAG | GTCTCGTGGGC<br>TCGGAGATGTG<br>TATAAGAGACAG<br>TGGAGGTACAG<br>CAGCAGC     | Used for HDR knock-in |

|              |                             |                     |                              |                      |                                          |       |                                                                           |                                                                               |
|--------------|-----------------------------|---------------------|------------------------------|----------------------|------------------------------------------|-------|---------------------------------------------------------------------------|-------------------------------------------------------------------------------|
| sgRNA-elav5  | <i>elav</i><br>(AAEL008164) | Chr3:<br>9,232,508  | GCTGACTTGTAACAC<br>CCGCTGG   | Fragment<br>analysis | Variability of<br>fragment length        | Low   | TGTA AACGACGG<br>CCAGTAGATTCGG<br>CGACAAACCACT                            | GTGTCTTTGGAA<br>AGGAGATAGAA<br>ATCTGTT                                        |
| sgRNA-elav6  | <i>elav</i><br>(AAEL008164) | Chr3:<br>9,232,875  | TTCTGATTTTCAGCGC<br>CGAAATGG | Fragment<br>analysis | Variability of<br>fragment length        | Low   | TGTA AACGACGG<br>CCAGTCCGCGATT<br>GTGGAATTCCTTG                           | GTGTCTTAGTAC<br>TCGCGTCTTGAT<br>GCG                                           |
| sgRNA-elav7  | <i>elav</i><br>(AAEL008164) | Chr3:<br>9,232,504  | ACGGATACACCCTTG<br>GCCAGCGG  | Fragment<br>analysis | Variability of<br>fragment length        | Low   | TGTA AACGACGG<br>CCAGTAGATTCGG<br>CGACAAACCACT                            | GTGTCTTTGGAA<br>AGGAGATAGAA<br>ATCTGTT                                        |
| sgRNA-elav8  | <i>elav</i><br>(AAEL008164) | Chr3:<br>9,232,454  | CGTCACGATGACCA<br>ACTACGAGG  | MiSeq                | Fraction of<br>reads that have<br>indels | 0.121 | TCGTCGGCAGCGT<br>CAGATGTGTATAA<br>GAGACAGCAAAGA<br>TTCGGCGACAAAC<br>CA    | GTCTCGTGGGC<br>TCGGAGATGTG<br>TATAAGAGACAG<br>GGATTGAGAATC<br>GTTTCAGGCG      |
| sgRNA-elav9  | <i>elav</i><br>(AAEL008164) | Chr3:<br>9,232,501  | TTGTAACACCCGCTG<br>GCCAAGGG  | MiSeq                | Fraction of<br>reads that have<br>indels | 0.011 | TCGTCGGCAGCGT<br>CAGATGTGTATAA<br>GAGACAGAGGGA<br>TACGGCTTCGTCA<br>C      | GTCTCGTGGGC<br>TCGGAGATGTG<br>TATAAGAGACAG<br>GGATTGAGAATC<br>GTTTCAGGCG      |
| sgRNA-elav10 | <i>elav</i><br>(AAEL008164) | Chr3:<br>9,232,485  | CTGGCGATTTCGATCT<br>CTCAACGG | MiSeq                | Fraction of<br>reads that have<br>indels | 0.085 | TCGTCGGCAGCGT<br>CAGATGTGTATAA<br>GAGACAGCAAAGA<br>TTCGGCGACAAAC<br>CA    | GTCTCGTGGGC<br>TCGGAGATGTG<br>TATAAGAGACAG<br>GGATTGAGAATC<br>GTTTCAGGCG      |
| sgRNA-nsyb1  | <i>nSyb</i><br>(AAEL024921) | Chr2:<br>99,332,681 | AGATCCTGTACGAGT<br>GCCGCCGG  | MiSeq                | Fraction of<br>reads that have<br>indels | 0.352 | TCGTCGGCAGCGT<br>CAGATGTGTATAA<br>GAGACAGACCACA<br>ACAGCCGATGATG<br>A     | GTCTCGTGGGC<br>TCGGAGATGTG<br>TATAAGAGACAG<br>AGAGTTGTGTTT<br>GTCGTCCTAT      |
| sgRNA-nsyb2  | <i>nSyb</i><br>(AAEL024921) | Chr2:<br>99,332,676 | GCAAGTCCCAGCTG<br>CTCCGGCGG  | MiSeq                | Fraction of<br>reads that have<br>indels | 0.232 | TCGTCGGCAGCGT<br>CAGATGTGTATAA<br>GAGACAGACCACA<br>ACAGCCGATGATG<br>A     | GTCTCGTGGGC<br>TCGGAGATGTG<br>TATAAGAGACAG<br>AGAGTTGTGTTT<br>GTCGTCCTAT      |
| sgRNA-nsyb3  | <i>nSyb</i><br>(AAEL024921) | Chr2:<br>99,332,646 | GATGCAGCAGATGC<br>CAATGCAGG  | MiSeq                | Fraction of<br>reads that have<br>indels | 0.176 | TCGTCGGCAGCGT<br>CAGATGTGTATAA<br>GAGACAGATGCTG<br>ATTAGAACTAGT<br>GACGAG | GTCTCGTGGGC<br>TCGGAGATGTG<br>TATAAGAGACAG<br>CCTCACTATCT<br>CGGTAGAAGTT<br>G |

Table S2. HDR efficiency. Related to STAR Methods.

| Construct                         | Target gene              | Donor construct                                                                   | Insert length (bp) | Homology arm length: left (bp) | Homology arm length: right (bp) | No. injected embryos | No. dsRed+ G1 families | No. dsRed+ G2 families | No. PCR verified families | Note                                                                                                                                                                             |
|-----------------------------------|--------------------------|-----------------------------------------------------------------------------------|--------------------|--------------------------------|---------------------------------|----------------------|------------------------|------------------------|---------------------------|----------------------------------------------------------------------------------------------------------------------------------------------------------------------------------|
| <i>Syt1-T2A-3XGCaMP6s</i>         | <i>Syt1</i> (AAEL000704) | Syt1LeftArm-T2A-GCaMP6s-T2A-GCaMP6s-T2A-GCaMP6s-SV40-3XP3-dsRed-SV40-Syt1RightArm | 5723               | 1374                           | 1822                            | 1098                 | >=2                    | >=2                    | 1                         | Bred and screened in bulk, so the exact number of families is unknown                                                                                                            |
| <i>Syt1-T2A-QF2-QUAS-GCaMP6s</i>  | <i>Syt1</i> (AAEL000704) | Syt1LeftArm-T2A-QF2-Hsp70-5XQUAS-GCaMP6s-SV40-3XP3-dsRed-SV40-Syt1RightArm        | 4689               | 1374                           | 1822                            | 1200                 | 5                      | NA                     | NA                        | Two G1 families had strong green fluorescence in the central and peripheral nervous system, but died at the late larval stage. The other three families were not positive at G2. |
| <i>Syt1-T2A-GAL4d-UAS-GCaMP6s</i> | <i>Syt1</i> (AAEL000704) | Syt1LeftArm-T2A-GAL4d-Hsp70-3XUAS-GCaMP6s-SV40-3XP3-dsRed-SV40-Syt1RightArm       | 4480               | 1374                           | 1822                            | 3500                 | 8                      | 4                      | 1                         |                                                                                                                                                                                  |
| <i>Syt1:GCaMP6s</i>               | <i>Syt1</i> (AAEL000704) | Syt1LeftArm-3XGS-GCaMP6s-SV40-3XP3-dsRed-SV40-Syt1RightArm                        | 2923               | 1374                           | 1822                            | 1200                 | 2                      | 2                      | 1                         |                                                                                                                                                                                  |
| <i>brp-T2A-QF2w</i>               | <i>brp</i> (AAEL018153)  | brpLeftArm-T2A-QF2w-Hsp70-3XP3-dsRed-SV40-brpRightArm                             | 2799               | 1011                           | 1043                            | 1533                 | 6                      | 2                      | 1                         |                                                                                                                                                                                  |

Table S3. Verify insertion. Related to STAR Methods.

| <b>Construct</b>                  | <b>Verification primer forward</b> | <b>Verification primer reverse</b> | <b>Expected product length (bp)</b> | <b>Observed band length</b> | <b>Sanger sequencing alignment file</b>                       |
|-----------------------------------|------------------------------------|------------------------------------|-------------------------------------|-----------------------------|---------------------------------------------------------------|
| <i>Syt1-T2A-3XGCaMP6s</i>         | GCTCTCAATTCGCTC<br>ATGTGAT         | CTTCAGCTTCAGGG<br>CCTT             | 6861                                | ~7kb                        | Syt13XGCaMP6s_Verification_Alignment_PCR_product              |
| <i>Syt1-T2A-QF2-QUAS-GCaMP6s</i>  | GCACAAGTCTCCCAA<br>CTGGT           | CGTAGTTGTGGGTC<br>CCAGAC           | 1669                                | 1.5kb - 2kb                 | Syt1QF2QUASGCaMP6s_Verification_Alignment_PCR_product         |
| <i>Syt1-T2A-GAL4d-UAS-GCaMP6s</i> | GCTCTCAATTCGCTC<br>ATGTGAT         | CTTCAGCTTCAGGG<br>CCTT             | 5618                                | 5kb - 6kb                   | Syt1T2AGal4dUASGCaMP6s_Verification_Alignment_PCR_P<br>roduct |
| <i>Syt1:GCaMP6s</i>               | GCTCTCAATTCGCTC<br>ATGTGAT         | GCATGAACTCCTTG<br>ATGACGT          | 3594                                | 3kb - 4kb                   | Syt1GCaMP6s_Verification_Alignment_PCR_product                |
| <i>brp-T2A-QF2w</i>               | TCCGGAAAGCATGGT<br>CAGTC           | CGTAGTTGTGGGTC<br>CCAGAC           | 1642                                | 1.5kb - 2kb                 | BrpT2AQF2w_Verification_Alignment_PCR_product                 |
